# Supplementary material
Source: publisher site journal article supplement (https://www.dovepress.com/article/313972)
Supplement: Supplementary file 1 [file get_supplementary_file.php]

**Catalogue**

**Table S1. Strategy of this meta-analysis……………………………………………………….…2**

**Tables S2-S5. Pairwise comparisons of cumulative morphine consumption ………………….3**

**Tables S6-S13. Pairwise comparisons of pain scores…….………………………………………4**

**Tables S14-S17. Pairwise comparisons of secondary outcomes.………………………………..5**

**Table S18. PRISMA NMA Checklist……………………….…………………………………..6-7**

**Figure S1. Risk of bias summary……………………........……………………………………...8**

**Figure S2. Risk of bias graph…………………. …………………………………………………9**

**Figure S3. Inconsistency test of cumulative morphine consumption…….………….……….10**

**Figure S4. Inconsistency test of pain scores………….…….…….…….……………………….11**

**Figure S5. Inconsistency of secondary outcomes….….…….….…….….…….…..….…….…12**

**Table S1. Strategy of this meta-analysis**

|  | Strategy |
| --- | --- |
| PubMed | #1: (randomized controlled trial[Publication Type] OR controlled clinical trial[Publication Type] OR randomized[Title/Abstract] OR random[Title/Abstract] OR randomly[Title/Abstract] OR controlled[Title/Abstract] OR trial[Title/Abstract] OR placebo[Title/Abstract] OR groups[Title/Abstract]) NOT ((animals [Mesh] OR swine [Title/Abstract] OR pig [Title/Abstract] OR pigs[Title/Abstract] OR piglet*[Title/Abstract] OR rat[Title/Abstract] OR mouse[Title/Abstract]) NOT humans [Mesh])  #2: Cesarean Section[Mesh] OR cesarean[Title/Abstract] OR caesarean[Title/Abstract]  #3: (Transvers* abdomin* plane block[Title/Abstract] OR Transvers* abdomin* block[Title/Abstract] OR TAPB[Title/Abstract] OR TAP block[Title/Abstract]) OR (infiltration[Title/Abstract] OR instillation[Title/Abstract] OR infusion[Title/Abstract]) OR (quadratus lumborum[Title/Abstract] OR quadratus block[Title/Abstract] OR QLB[Title/Abstract] OR TQL[Title/Abstract] OR QL block[Title/Abstract]) OR (ilioinguinal[Title/Abstract] OR ilio-inguinal[Title/Abstract] OR iliohypogastric[Title/Abstract]) OR (erector spinae[Title/Abstract]) OR (rectus sheath[Title/Abstract]) OR (transversalis fascia [Title/Abstract])  #4: Pain, Postoperative[Mesh] OR Postoperative pain[Title/Abstract] OR postcesarean pain [Title/Abstract] OR post-cesarean pain[Title/Abstract] OR analgesia[Title/Abstract] OR analgesic[Title/Abstract]  #5: #1 AND #2 AND #3 AND #4 |
| MEDLINE | #1: (randomized controlled trial.pt OR controlled clinical trial.pt OR randomized.mp. OR placebo.mp. OR randomly.mp. OR trial.ti. OR Clinical Trials as Topic/) NOT (animals.sh. NOT humans.sh.)  #2: Cesarean Section.sh. OR (cesarean OR caesarean).mp.  #3: (Transvers* abdomin* plane block OR Transvers* abdomin* block OR TAPB OR TAP block).mp. OR (infiltration OR instillation OR infusion).mp. OR (quadratus lumborum OR quadratus block OR QLB OR TQL OR QL block).mp. OR (ilioinguinal OR ilio-inguinal OR iliohypogastric).mp. OR (erector spinae).mp. OR (rectus sheath).mp. OR (transversalis fascia).mp.  #4: (Pain, Postoperative).sh. OR (Postoperative pain OR postcesarean pain OR post-cesarean pain OR analgesia OR analgesic).mp.  #5: #1 AND #2 AND #3 AND #4 |
| Web of science | #1: TS = (randomized OR random OR randomly OR controlled OR placebo)  #2: TS = (cesarean section OR caesarean section OR cesarean delivery OR caesarean delivery)  #3: TS = (Transvers* abdomin* plane block OR Transvers* abdomin* block OR TAPB OR TAP block OR would infiltration OR would instillation OR would infusion OR quadratus lumborum OR quadratus block OR QLB OR TQL OR QL block OR ilioinguinal OR ilio-inguinal OR iliohypogastric OR erector spinae OR rectus sheath OR transversalis fascia)  #4: TS = (Postoperative pain OR postcesarean pain OR post-cesarean pain OR analgesia OR analgesic)  #5: #1 AND #2 AND #3 AND #4 |
| Embase | #1: 'random*':ab,ti OR 'placebo':ab,ti OR 'double-blind':ab,ti OR 'controlled':ab,ti OR 'group':ab,ti OR 'trial':ab,ti  #2: 'Cesarean Section'/exp OR 'cesarean':ab,ti OR 'caesarean':ab,ti  #3: 'Transvers* abdomin* plane block':ab,ti OR 'Transvers* abdomin* block':ab,ti OR 'TAPB':ab,ti OR 'TAP block':ab,ti OR ('wound':ab,ti AND ('Infiltration':ab,ti OR 'Instillation':ab,ti OR 'Infusion':ab,ti)) OR 'quadratus lumborum':ab,ti OR 'quadratus block':ab,ti OR 'QLB':ab,ti OR 'TQL':ab,ti OR 'QL block':ab,ti OR 'Ilioinguinal':ab,ti OR 'ilio-inguinal':ab,ti OR 'iliohypogastric':ab,ti OR 'erector spinae':ab,ti OR 'rectus sheath':ab,ti OR 'transversalis fascia':ab,ti  #4: 'Pain, Postoperative'/exp OR 'Postoperative pain':ab,ti OR 'postcesarean pain':ab,ti OR 'post-cesarean pain':ab,ti OR 'analgesia':ab,ti OR 'analgesic':ab,ti  #5: #1 AND #2 AND #3 AND #4 |
| ClinicalTrials.gov | Postoperative pain | Interventional Studies | Cesarean Section | Local anesthetic | Studies with Female Participants |
| Cochrane library | #1："random*" OR "placebo" OR "double-blind" OR "controlled"  #2："analgesia" OR "analgesic" OR "Postoperative pain" OR "postcesarean pain" OR "post-cesarean pain"  #3："Transvers* abdomin* block" OR "wound infiltration" OR "wound instillation" OR "wound infusion" OR "quadratus lumborum" OR "quadratus block" OR "ilioinguinal" OR "ilio-inguinal" OR "iliohypogastric" OR "erector spinae" OR "rectus sheath"  #4： MeSH descriptor: [Cesarean Section] explode all trees  #5： #1 AND #2 AND #3 AND #4 |

**Table S2. Pairwise comparisons of cumulative morphine consumption 6h (mg)**

| Control | **-15.3 (-26.81, -3.78)** | -8.34 (-16.83, 0.55) | **-9.35 (-14.44, -4.20)** | -5.4 (-12.22, 1.32) |
| --- | --- | --- | --- | --- |
|  | IIIH | 6.98 (-7.3, 21.58) | 5.95 (-6.58, 18.62) | 9.91 (-3.6, 23.3) |
|  | QLB | -1.01 (-9.83, 7.46) | 2.95 (-7.97, 13.24) |
|  | TAPB | 3.95 (-3.55, 11.28) |
|  | WI |

IIIH, ilioinguinal and iliohypogastric nerve block; QLB, quadratus lumborum block; TAPB, transversus abdominis plane block; WI, wound infiltration. Significant results (*P* < 0.05) are marked in bold.

**Table S3. Pairwise comparisons of cumulative morphine consumption 12h (mg)**

| Control | -14.13 (-30.90, 1.22) | -12.1 (-27.79, 3.90) | **-14.70 (-23.84, -5.36)** | **-13.91 (-25.97, -1.85)** |
| --- | --- | --- | --- | --- |
|  | IIIH | 2.01 (-19.72, 25.48) | -0.56 (-18.26, 18.82) | 0.19 (-19.24, 20.99) |
|  | QLB | -2.58 (-18.42, 13.15) | -1.82 (-20.76, 16.7) |
|  | TAPB | 0.78 (-11.27, 12.6) |
|  | WI |

IIIH, ilioinguinal and iliohypogastric nerve block; QLB, quadratus lumborum block; TAPB, transversus abdominis plane block; WI, wound infiltration. Significant results (*P* < 0.05) are marked in bold.

**Table S4. Pairwise comparisons of cumulative morphine consumption 24h (mg)**

| Control | -9.65 (-23.69, 4.19) | **-16.72 (-31.60, -2.19)** | **-17.92 (-26.99, -8.97)** | -18.95 (-46.07, 8.09) | **-12.70 (-22.42, -3.22)** |
| --- | --- | --- | --- | --- | --- |
|  | IIIH | -7.07 (-27.43, 13.17) | -8.26 (-24.71, 8.41) | -9.34 (-39.76, 21.29) | -3.03 (-20.02, 13.87) |
|  | QLB | -1.21 (-16.84, 14.72) | -2.27 (-32.94, 28.74) | 4 (-13.08, 21.23) |
|  | TAPB | -1.08 (-29.61, 27.58) | 5.22 (-6.08, 16.31) |
|  | TFPB | 6.3 (-22.71, 34.87) |
|  | WI |

IIIH, ilioinguinal and iliohypogastric nerve block; QLB, quadratus lumborum block; TAPB, transversus abdominis plane block; TFPB, transversalis fascia plane block; WI, wound infiltration. Significant results (*P* < 0.05) are marked in bold.

**Table S5. Pairwise comparisons of cumulative morphine consumption 48h (mg)**

| Control | **-26.39 (-52.19, -0.74)** | **-29.42 (-59.29, -0.94)** | -23.92 (-51.32, 0.67) |
| --- | --- | --- | --- |
|  | QLB | -2.98 (-36.71, 29.27) | 2.51 (-32.91, 34.96) |
|  | TAPB | 5.49 (-23.91, 33.48) |
|  | WI |

QLB, quadratus lumborum block; TAPB, transversus abdominis plane block; WI, wound infiltration. Significant results (*P* < 0.05) are marked in bold.

**Table S6. Pairwise comparisons of pain score 6h at rest**

| Control | **-28.38 (-47.46, -9.40)** | -6.23 (-14.41, 2.03) | **-19.33 (-29.36, -9.23)** | **-10.94 (-17.04, -4.82)** | 0.01 (-18.10, 18.10) | -6.71 (-13.33, 0.01) |
| --- | --- | --- | --- | --- | --- | --- |
|  | ESB | **22.15 (1.95, 42.57)** | 9.06 (-12.19, 30.42) | 17.45 (-0.5, 35.46) | **28.38 (2.12, 54.55)** | **21.66 (2.15, 41.4)** |
|  | IIIH | **-13.1 (-26.03, -0.17)** | -4.7 (-14.23, 4.76) | 6.19 (-13.66, 26.1) | -0.45 (-10.88, 9.87) |
|  | QLB | 8.41 (-2.92, 19.68) | 19.31 (-1.32, 40.03) | **12.61 (0.72, 24.6)** |
|  | TAPB | 10.9 (-8.16, 29.97) | 4.22 (-3.61, 12.11) |
|  | TFPB | -6.68 (-25.95, 12.56) |
|  | WI |

ESB, erector spinae block; IIIH, ilioinguinal and iliohypogastric nerve block; QLB, quadratus lumborum block; TAPB, transversus abdominis plane block; TFPB, transversalis fascia plane block; WI, wound infiltration. Significant results (*P* < 0.05) are marked in bold.

**Table S7. Pairwise comparisons of pain score 6h at movement**

| Control | **-38.35 (-62.45, -14.19)** | **-25.49 (-41.83, -9.05)** | **-23.05 (-37.83, -8.33)** | **-18.38 (-27.87, -8.79)** | -7.60 (-30.03, 14.85) | -10.21 (-21.66, 1.26) |
| --- | --- | --- | --- | --- | --- | --- |
|  | ESB | 12.88 (-14.75, 40.47) | 15.28 (-12.46, 42.86) | 19.99 (-2.21, 42.1) | 30.71 (-2.14, 63.74) | **28.11 (2.63, 53.59)** |
|  | IIIH | 2.49 (-19.35, 24.01) | 7.13 (-9.3, 23.57) | 17.92 (-9.84, 45.63) | 15.29 (-4, 34.58) |
|  | QLB | 4.66 (-11.77, 21.29) | 15.43 (-11.3, 42.43) | 12.81 (-5.5, 31.36) |
|  | TAPB | 10.78 (-13.55, 35.14) | 8.15 (-4.53, 20.89) |
|  | TFPB | -2.61 (-27.77, 22.6) |
|  | WI |

ESB, erector spinae block; IIIH, ilioinguinal and iliohypogastric nerve block; QLB, quadratus lumborum block; TAPB, transversus abdominis plane block; TFPB, transversalis fascia plane block; WI, wound infiltration. Significant results (*P* < 0.05) are marked in bold.

**Table S8. Pairwise comparisons of pain score 12h at rest**

| Control | **-31.42 (-48.38, -14.47)** | -7.32 (-16.02, 1.32) | **-17.48 (-27.20, -7.65)** | **-10.83 (-16.65, -5.03)** | -0.01 (-16.26, 16.25) | -5.58 (-11.56, 0.34) |
| --- | --- | --- | --- | --- | --- | --- |
|  | ESB | **24.09 (5.52, 42.61)** | 13.95 (-5.26, 33.26) | **20.59 (4.61, 36.5)** | **31.42 (7.97, 54.86)** | **25.82 (8.34, 43.33)** |
|  | IIIH | -10.15 (-23.02, 2.92) | -3.5 (-12.95, 6) | 7.3 (-11.02, 25.66) | 1.75 (-8.52, 12.04) |
|  | QLB | 6.65 (-4.25, 17.31) | 17.48 (-1.57, 36.4) | **11.91 (0.56, 23.15)** |
|  | TAPB | 10.83 (-6.45, 28.17) | 5.26 (-1.97, 12.47) |
|  | TFPB | -5.56 (-22.89, 11.79) |
|  | WI |

ESB, erector spinae block; IIIH, ilioinguinal and iliohypogastric nerve block; QLB, quadratus lumborum block; TAPB, transversus abdominis plane block; TFPB, transversalis fascia plane block; WI, wound infiltration. Significant results (*P* < 0.05) are marked in bold.

**Table S9. Pairwise comparisons of pain score 12h at movement**

| Control | **-31.16 (-54.08, -8.32)** | **-16.24 (-31.81, -0.87)** | **-22.17 (-37.64, -6.89)** | **-12.57 (-21.89, -3.39)** | -9.96 (-31.23, 11.32) | **-11.97 (-22.88, -1.02)** |
| --- | --- | --- | --- | --- | --- | --- |
|  | ESB | 14.9 (-11.04, 40.84) | 8.98 (-17.8, 35.46) | 18.6 (-2.28, 39.45) | 21.15 (-9.9, 52.45) | 19.19 (-4.94, 43.52) |
|  | IIIH | -5.92 (-27.27, 15.27) | 3.69 (-11.83, 19.18) | 6.26 (-19.94, 32.79) | 4.29 (-13.86, 22.62) |
|  | QLB | 9.6 (-6.89, 26.39) | 12.19 (-13.77, 38.59) | 10.2 (-8.04, 28.89) |
|  | TAPB | 2.57 (-20.49, 26.04) | 0.59 (-11.48, 12.88) |
|  | TFPB | -1.97 (-25.8, 21.84) |
|  | WI |

ESB, erector spinae block; IIIH, ilioinguinal and iliohypogastric nerve block; QLB, quadratus lumborum block; TAPB, transversus abdominis plane block; TFPB, transversalis fascia plane block; WI, wound infiltration. Significant results (*P* < 0.05) are marked in bold.

**Table S10. Pairwise comparisons of pain score 24h at rest**

| Control | -9.72 (-23.97, 4.59) | -3.23 (-10.25, 4.09) | -4.87 (-12.56, 2.84) | -4.04 (-8.73, 0.73) | 5.34 (-8.54, 19.16) | -3.9 (-9.14, 1.34) |
| --- | --- | --- | --- | --- | --- | --- |
|  | ESB | 6.5 (-8.99, 22.26) | 4.86 (-11.19, 20.87) | 5.69 (-7.77, 19.16) | 15.09 (-4.83, 34.97) | 5.85 (-9.05, 20.64) |
|  | IIIH | -1.66 (-12.23, 8.69) | -0.82 (-8.75, 6.93) | 8.59 (-7.18, 24.02) | -0.67 (-9.53, 7.93) |
|  | QLB | 0.83 (-7.8, 9.54) | 10.22 (-5.64, 26.04) | 0.98 (-8.29, 10.19) |
|  | TAPB | 9.42 (-5.31, 23.97) | 0.15 (-6.1, 6.35) |
|  | TFPB | -9.25 (-24.04, 5.56) |
|  | WI |

ESB, erector spinae block; IIIH, ilioinguinal and iliohypogastric nerve block; QLB, quadratus lumborum block; TAPB, transversus abdominis plane block; TFPB, transversalis fascia plane block; WI, wound infiltration.

**Table S11. Pairwise comparisons of pain score 24h at movement**

| Control | -18.25 (-37.80, 1.41) | **-15.33 (-28.70, -1.90)** | -8.61 (-20.76, 3.46) | **-12.21 (-19.69, -4.61)** | -2.24 (-21.58, 16.96) | **-10.49 (-19.06, -1.95)** |
| --- | --- | --- | --- | --- | --- | --- |
|  | ESB | 2.93 (-19.69, 25.4) | 9.64 (-13.05, 31.99) | 6.02 (-12.06, 24.18) | 16.05 (-11.61, 43.29) | 7.75 (-12.96, 28.42) |
|  | IIIH | 6.76 (-11.1, 24.35) | 3.11 (-10.29, 16.58) | 13.11 (-10.43, 36.65) | 4.83 (-10.68, 20.24) |
|  | QLB | -3.63 (-16.86, 9.94) | 6.37 (-16.32, 29.09) | -1.9 (-16.45, 12.7) |
|  | TAPB | 9.96 (-10.79, 30.55) | 1.71 (-8.39, 11.65) |
|  | TFPB | -8.3 (-29.38, 12.82) |
|  | WI |

ESB, erector spinae block; IIIH, ilioinguinal and iliohypogastric nerve block; QLB, quadratus lumborum block; TAPB, transversus abdominis plane block; TFPB, transversalis fascia plane block; WI, wound infiltration. Significant results (*P* < 0.05) are marked in bold.

**Table S12. Pairwise comparisons of pain score 48h at rest**

| Control | -18.85 (-39.37, 1.77) | -2.02 (-10.30, 6.11) | -7.82 (-16.60, 1.02) | -0.54 (-9.29, 8.39) |
| --- | --- | --- | --- | --- |
|  | ESB | 16.88 (-4.87, 38.2) | 11.02 (-7.64, 29.59) | 18.33 (-2.7, 39.43) |
|  | QLB | -5.81 (-16.51, 5.13) | 1.44 (-9.96, 13.33) |
|  | TAPB | 7.28 (-2.66, 17.37) |
|  | WI |

ESB, erector spinae block; QLB, quadratus lumborum block; TAPB, transversus abdominis plane block; WI, wound infiltration.

**Table S13. Pairwise comparisons of pain score 48h at movement**

| Control | -17.23 (-41.64, 7.69) | -3.27 (-14.93, 8.40) | -7.89 (-18.46, 3.25) | -6.88 (-18.23, 4.74) |
| --- | --- | --- | --- | --- |
|  | ESB | 13.97 (-12.43, 39.7) | 9.33 (-12.76, 31.47) | 10.36 (-15.29, 35.49) |
|  | QLB | -4.65 (-18.15, 9.66) | -3.62 (-19.14, 12.1) |
|  | TAPB | 1.01 (-11.75, 13.29) |
|  | WI |

ESB, erector spinae block; QLB, quadratus lumborum block; TAPB, transversus abdominis plane block; WI, wound infiltration.

**Table S14. Pairwise comparisons of Time to first analgesic request (min)**

| Control | 246.19 (-1339.87, 1828.02) | 260.22 (-476.89, 998.55) | **966.76 (262.82, 1662.52)** | 26.49 (-475.87, 532.27) | 364.39 (-723.14, 1452.48) | 7.03 (-570.35, 580.46) |
| --- | --- | --- | --- | --- | --- | --- |
|  | ESB | 13.24 (-1689.3, 1714.76) | 717.92 (-954.8, 2394.21) | -222.13 (-1715.39, 1280.27) | 116.58 (-1730.8, 1962.72) | -241.41 (-1869.41, 1401.69) |
|  | IIIH | 704.62 (-286.45, 1694.81) | -234.6 (-1045.66, 575.21) | 104.28 (-1181.91, 1397.11) | -253.93 (-1112.51, 607.04) |
|  | QLB | **-939.24 (-1674.49, -197.91)** | -602.49 (-1853.34, 657.33) | **-959.33 (-1826.27, -80.74)** |
|  | TAPB | 337.77 (-748.45, 1425.47) | -20.21 (-680.05, 639.84) |
|  | TFPB | -358.46 (-1560.29, 845.53) |
|  | WI |

ESB, erector spinae block; IIIH, ilioinguinal and iliohypogastric nerve block; QLB, quadratus lumborum block; TAPB, transversus abdominis plane block; TFPB, transversalis fascia plane block; WI, wound infiltration. Significant results (*P* < 0.05) are marked in bold.

**Table S15. Pairwise comparisons of postoperative nausea and vomiting**

| Control | 0.43 (0.11, 1.27) | 0.74 (0.14, 3.67) | **0.37 (0.15, 0.86)** | 0.47 (0.10, 2.25) | 0.55 (0.22, 1.26) |
| --- | --- | --- | --- | --- | --- |
|  | IIIH | 1.71 (0.24, 14.12) | 0.87 (0.22, 4.08) | 1.11 (0.17, 8.75) | 1.27 (0.32, 5.95) |
|  | QLB | 0.5 (0.08, 3.22) | 0.64 (0.07, 6.39) | 0.74 (0.12, 4.71) |
|  | TAPB | 1.27 (0.25, 6.68) | 1.47 (0.54, 3.92) |
|  | TFPB | 1.16 (0.2, 6.49) |
|  | WI |

IIIH, ilioinguinal and iliohypogastric nerve block; QLB, quadratus lumborum block; TAPB, transversus abdominis plane block; TFPB, transversalis fascia plane block; WI, wound infiltration. Significant results (*P* < 0.05) are marked in bold.

**Table S16. Pairwise comparisons of pruritus**

| Control | 2.19 (0.29, 16.05) | 0.74 (0.21, 2.44) | 0.73 (0.22, 1.98) | 1.01 (0.08, 12.20) | 0.77 (0.25, 2.14) |
| --- | --- | --- | --- | --- | --- |
|  | IIIH | 0.33 (0.03, 3.54) | 0.33 (0.03, 3.09) | 0.46 (0.02, 11.59) | 0.35 (0.04, 3.38) |
|  | QLB | 0.99 (0.22, 3.78) | 1.38 (0.09, 21.97) | 1.05 (0.21, 4.64) |
|  | TAPB | 1.39 (0.1, 23.14) | 1.06 (0.34, 3.61) |
|  | TFPB | 0.76 (0.05, 10.85) |
|  | WI |

IIIH, ilioinguinal and iliohypogastric nerve block; QLB, quadratus lumborum block; TAPB, transversus abdominis plane block; TFPB, transversalis fascia plane block; WI, wound infiltration.

**Table S17. Pairwise comparisons of sedation**

| Control | 0.23 (0.003, 8.23) | 0.20 (0.01, 2.95) | **0.19 (0.05, 0.58)** | **0.17 (0.03, 0.69)** |
| --- | --- | --- | --- | --- |
|  | IIIH | 0.87 (0.01, 122.48) | 0.85 (0.02, 66.46) | 0.76 (0.01, 62.93) |
|  | QLB | 0.98 (0.06, 28.14) | 0.87 (0.04, 28.07) |
|  | TAPB | 0.9 (0.23, 2.93) |
|  | WI |

IIIH, ilioinguinal and iliohypogastric nerve block; QLB, quadratus lumborum block; TAPB, transversus abdominis plane block; WI, wound infiltration. Significant results (*P* < 0.05) are marked in bold.

**Table S18. PRISMA NMA Checklist of Items to Include When Reporting A Systematic Review Involving a Network Meta-analysis**

| **Section/Topic** | **Item #** | **Checklist Item** | **Reported on Page #** |
| --- | --- | --- | --- |
| **TITLE** |  |  |  |
| Title | 1 | Identify the report as a systematic review *incorporating a network meta-analysis (or related form of meta-analysis).* | **Page 1** |
| **ABSTRACT** |  |  |  |
| Structured summary | 2 | Provide a structured summary including, as applicable:  **Background:** main objectives  **Methods:** data sources; study eligibility criteria, participants, and interventions; study appraisal; and *synthesis methods, such as network meta-analysis.*  **Results:** number of studies and participants identified; summary estimates with corresponding confidence/credible intervals; *treatment rankings may also be discussed. Authors may choose to summarize pairwise comparisons against a chosen treatment included in their analyses for brevity.*  **Discussion/Conclusions:** limitations; conclusions and implications of findings.  **Other:** primary source of funding; systematic review registration number with registry name. | **Page 2** |
| **INTRODUCTION** |  |  |  |
| Rationale | 3 | Describe the rationale for the review in the context of what is already known*, including mention of why a network meta-analysis has been conducted.* | **Page 3** |
| Objectives | 4 | Provide an explicit statement of questions being addressed, with reference to participants, interventions, comparisons, outcomes, and study design (PICOS). | **Page 3** |
| **METHODS** |  |  |  |
| Protocol and registration | 5 | Indicate whether a review protocol exists and if and where it can be accessed (e.g., Web address); and, if available, provide registration information, including registration number. | **Page 4** |
| Eligibility criteria | 6 | Specify study characteristics (e.g., PICOS, length of follow-up) and report characteristics (e.g., years considered, language, publication status) used as criteria for eligibility, giving rationale. *Clearly describe eligible treatments included in the treatment network, and note whether any have been clustered or merged into the same node (with justification).* | **Page 4** |
| Information sources | 7 | Describe all information sources (e.g., databases with dates of coverage, contact with study authors to identify additional studies) in the search and date last searched. | **Page 4** |
| Search | 8 | Present full electronic search strategy for at least one database, including any limits used, such that it could be repeated. | **Page 4** |
| Study selection | 9 | State the process for selecting studies (i.e., screening, eligibility, included in systematic review, and, if applicable, included in the meta-analysis). | **Page 4** |
| Data collection process | 10 | Describe method of data extraction from reports (e.g., piloted forms, independently, in duplicate) and any processes for obtaining and confirming data from investigators. | **Page 4-5** |
| Data items | 11 | List and define all variables for which data were sought (e.g., PICOS, funding sources) and any assumptions and simplifications made. | **Page 4-5** |
| **Geometry of the network** | **S1** | Describe methods used to explore the geometry of the treatment network under study and potential biases related to it. This should include how the evidence base has been graphically summarized for presentation, and what characteristics were compiled and used to describe the evidence base to readers. | **Figure 2** |
| Risk of bias within individual studies | 12 | Describe methods used for assessing risk of bias of individual studies (including specification of whether this was done at the study or outcome level), and how this information is to be used in any data synthesis. | **Page 5** |
| Summary measures | 13 | State the principal summary measures (e.g., risk ratio, difference in means). *Also describe the use of additional summary measures assessed, such as treatment rankings and surface under the cumulative ranking curve (SUCRA) values, as well as modified approaches used to present summary findings from meta-analyses.* | **Page 5** |
| Planned methods of analysis | 14 | Describe the methods of handling data and combining results of studies for each network meta-analysis. This should include, but not be limited to:   - *Handling of multi-arm trials;* - *Selection of variance structure;* - *Selection of prior distributions in Bayesian analyses; and* - *Assessment of model fit.* | **Page 5** |
| **Assessment of Inconsistency** | **S2** | Describe the statistical methods used to evaluate the agreement of direct and indirect evidence in the treatment network(s) studied. Describe efforts taken to address its presence when found. | **Page 5** |
| Risk of bias across studies | 15 | Specify any assessment of risk of bias that may affect the cumulative evidence (e.g., publication bias, selective reporting within studies). | **Page 5** |
| Additional analyses | 16 | Describe methods of additional analyses if done, indicating which were pre-specified. This may include, but not be limited to, the following:   - Sensitivity or subgroup analyses; - Meta-regression analyses; - *Alternative formulations of the treatment network; and* - *Use of alternative prior distributions for Bayesian analyses (if applicable).* | ***/*** |
| **RESULTS†** |  |  |  |
| Study selection | 17 | Give numbers of studies screened, assessed for eligibility, and included in the review, with reasons for exclusions at each stage, ideally with a flow diagram. | **Page 5-6** |
| **Presentation of network structure** | **S3** | Provide a network graph of the included studies to enable visualization of the geometry of the treatment network. | **Page 6** |
| **Summary of network geometry** | **S4** | Provide a brief overview of characteristics of the treatment network. This may include commentary on the abundance of trials and randomized patients for the different interventions and pairwise comparisons in the network, gaps of evidence in the treatment network, and potential biases reflected by the network structure. | **Page 6** |
| Study characteristics | 18 | For each study, present characteristics for which data were extracted (e.g., study size, PICOS, follow-up period) and provide the citations. | **Page 6** |
| Risk of bias within studies | 19 | Present data on risk of bias of each study and, if available, any outcome level assessment. | **Supplemental file** |
| Results of individual studies | 20 | For all outcomes considered (benefits or harms), present, for each study: 1) simple summary data for each intervention group, and 2) effect estimates and confidence intervals. *Modified approaches may be needed to deal with information from larger networks.* | **Page 6** |
| Synthesis of results | 21 | Present results of each meta-analysis done, including confidence/credible intervals. *In larger networks, authors may focus on comparisons versus a particular comparator (e.g. placebo or standard care), with full findings presented in an appendix. League tables and forest plots may be considered to summarize pairwise comparisons.* If additional summary measures were explored (such as treatment rankings), these should also be presented. | **Page 6-7** |
| **Exploration for inconsistency** | **S5** | Describe results from investigations of inconsistency. This may include such information as measures of model fit to compare consistency and inconsistency models, *P* values from statistical tests, or summary of inconsistency estimates from different parts of the treatment network. | **Page 7** |
| Risk of bias across studies | 22 | Present results of any assessment of risk of bias across studies for the evidence base being studied. | **Page 7** |
| Results of additional analyses | 23 | Give results of additional analyses, if done (e.g., sensitivity or subgroup analyses, meta-regression analyses*, alternative network geometries studied, alternative choice of prior distributions for Bayesian analyses,* and so forth). | ***/*** |
| **DISCUSSION** |  |  |  |
| Summary of evidence | 24 | Summarize the main findings, including the strength of evidence for each main outcome; consider their relevance to key groups (e.g., healthcare providers, users, and policy-makers). | **Page 7-10** |
| Limitations | 25 | Discuss limitations at study and outcome level (e.g., risk of bias), and at review level (e.g., incomplete retrieval of identified research, reporting bias). *Comment on the validity of the assumptions, such as transitivity and consistency. Comment on any concerns regarding network geometry (e.g., avoidance of certain comparisons).* | **Page 10** |
| Conclusions | 26 | Provide a general interpretation of the results in the context of other evidence, and implications for future research. | **Page 10** |
| **FUNDING** |  |  |  |
| Funding | 27 | Describe sources of funding for the systematic review and other support (e.g., supply of data); role of funders for the systematic review. This should also include information regarding whether funding has been received from manufacturers of treatments in the network and/or whether some of the authors are content experts with professional conflicts of interest that could affect use of treatments in the network. | **Page 11** |

Notes: PRISMA figure adapted from Liberati A, Altman D, Tetzlaff J, et al. The PRISMA statement for reporting systematic reviews and meta-analyses of studies that evaluate health care interventions: explanation and elaboration. Journal of clinical epidemiology. 2009;62(10). Creative Commons.

PICOS = population, intervention, comparators, outcomes, study design.

† Authors may wish to plan for use of appendices to present all relevant information in full detail for items in this section.


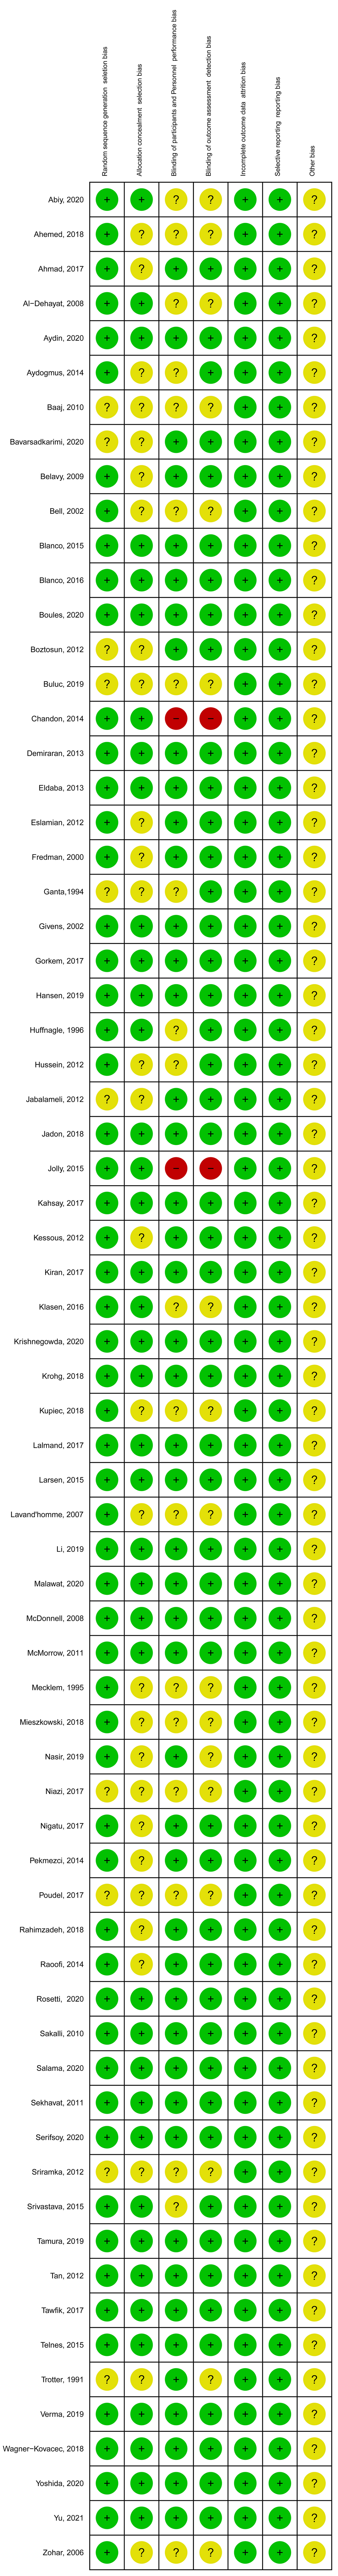


**Figure S1.** Risk of bias summary. “+”: low risk of bias; “-“: high risk of bias; “?”: unclear risk of bias.


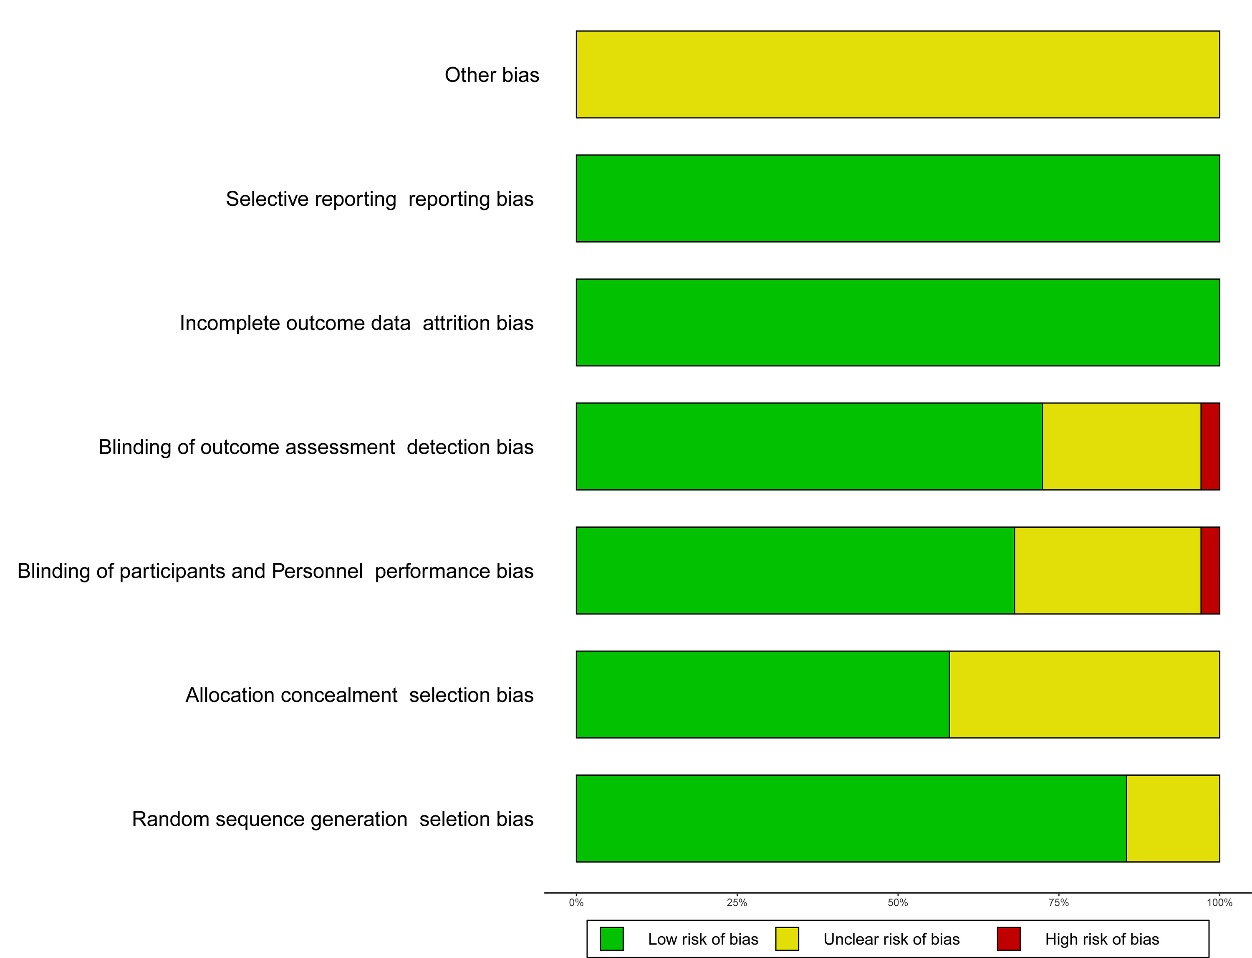


**Figure S2.** Risk of bias graph.


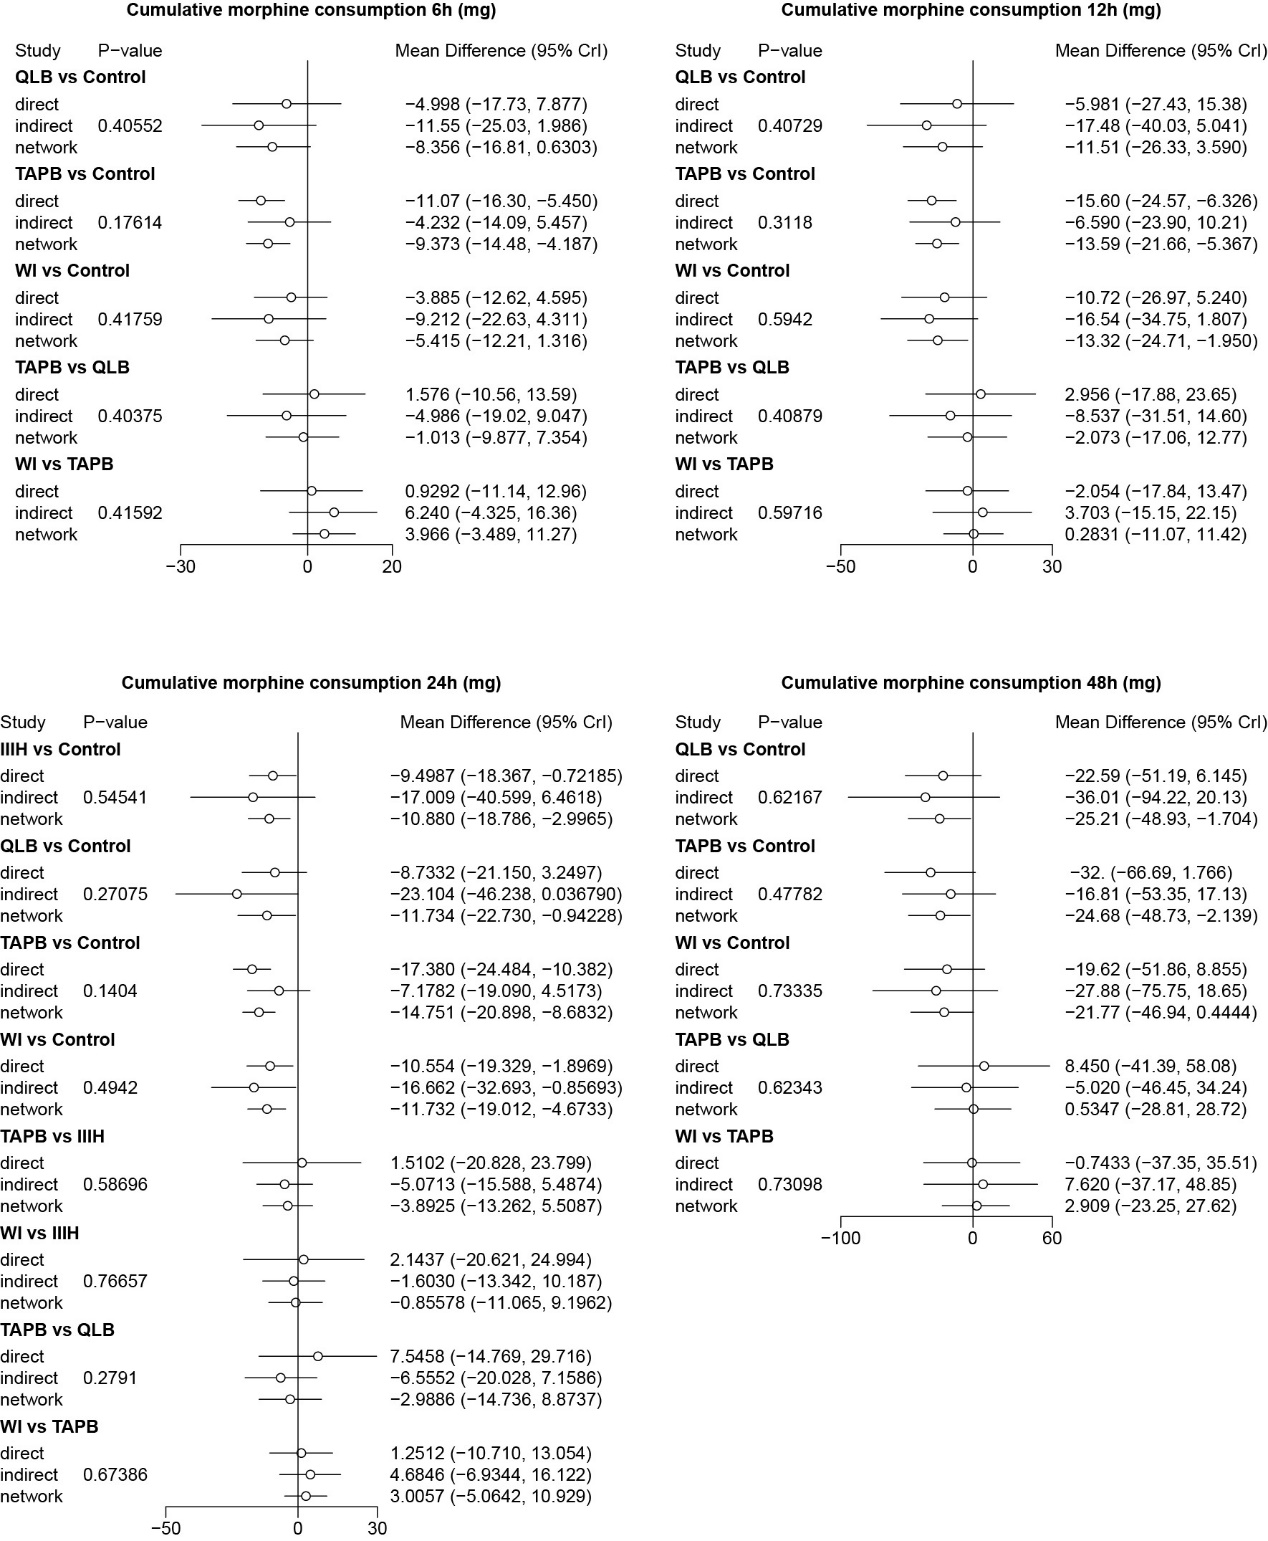


**Figure S3.** Inconsistency test of cumulative morphine consumption


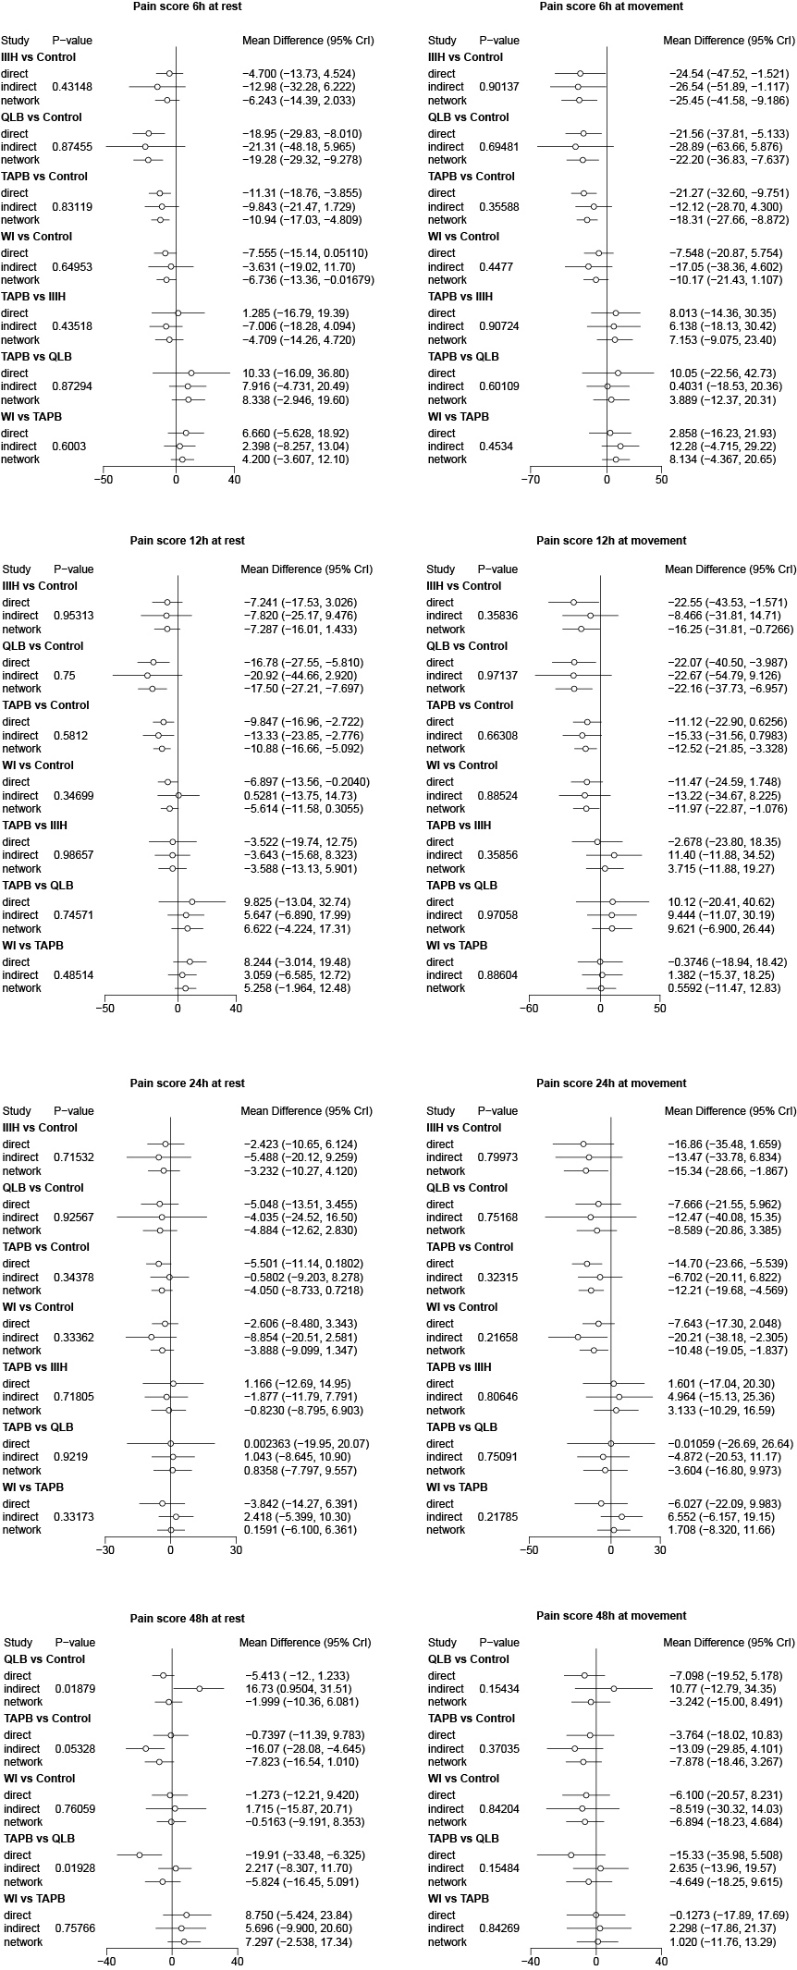


**Figure S4.** Inconsistency test of pain scores


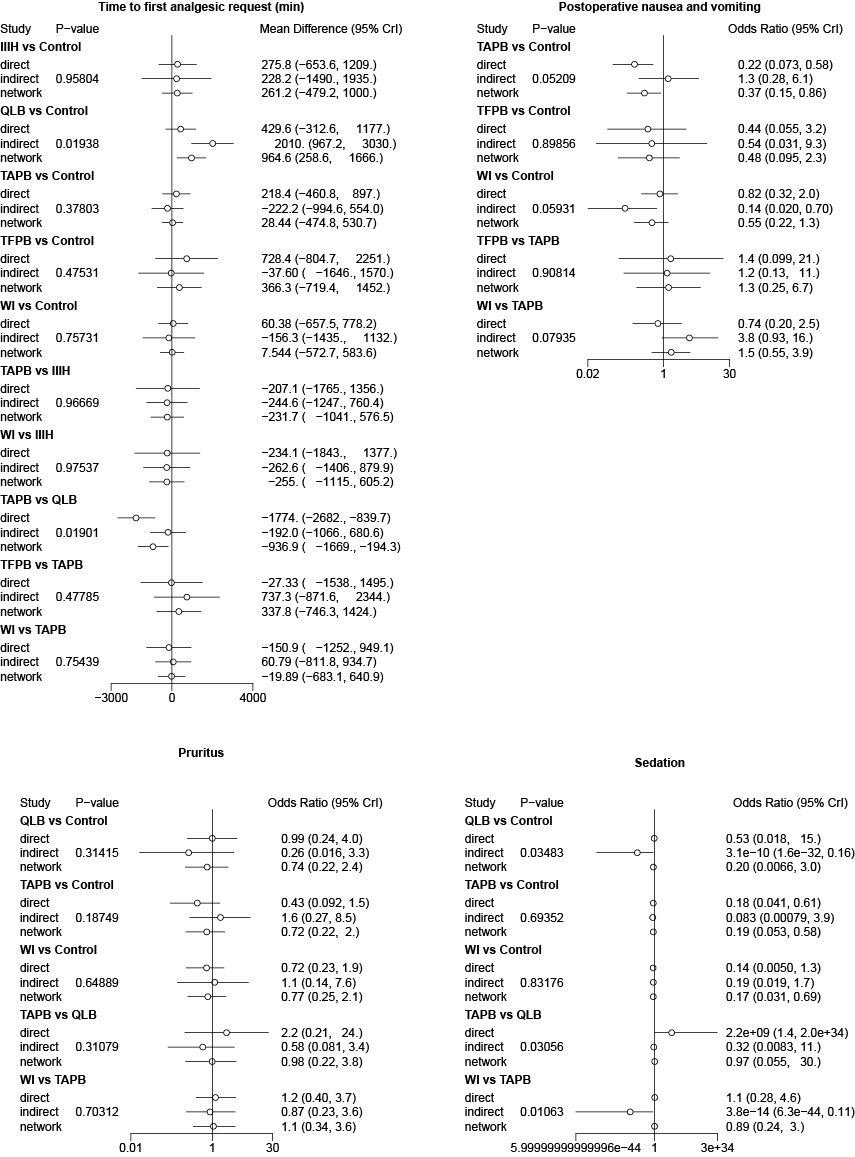


**Figure S5.** Inconsistency test of time to first analgesic request, postoperative nausea and vomiting, pruritus, and sedation.
